# Supplementary material for: A DNA barcode library for the butterflies of North America
Source: PeerJ journal article supplement (doi:10.7717/peerj.11157), 2021-04-19
Supplement: Supplemental_figure_S6.pdf [file Supplemental_figure_S6.pdf]

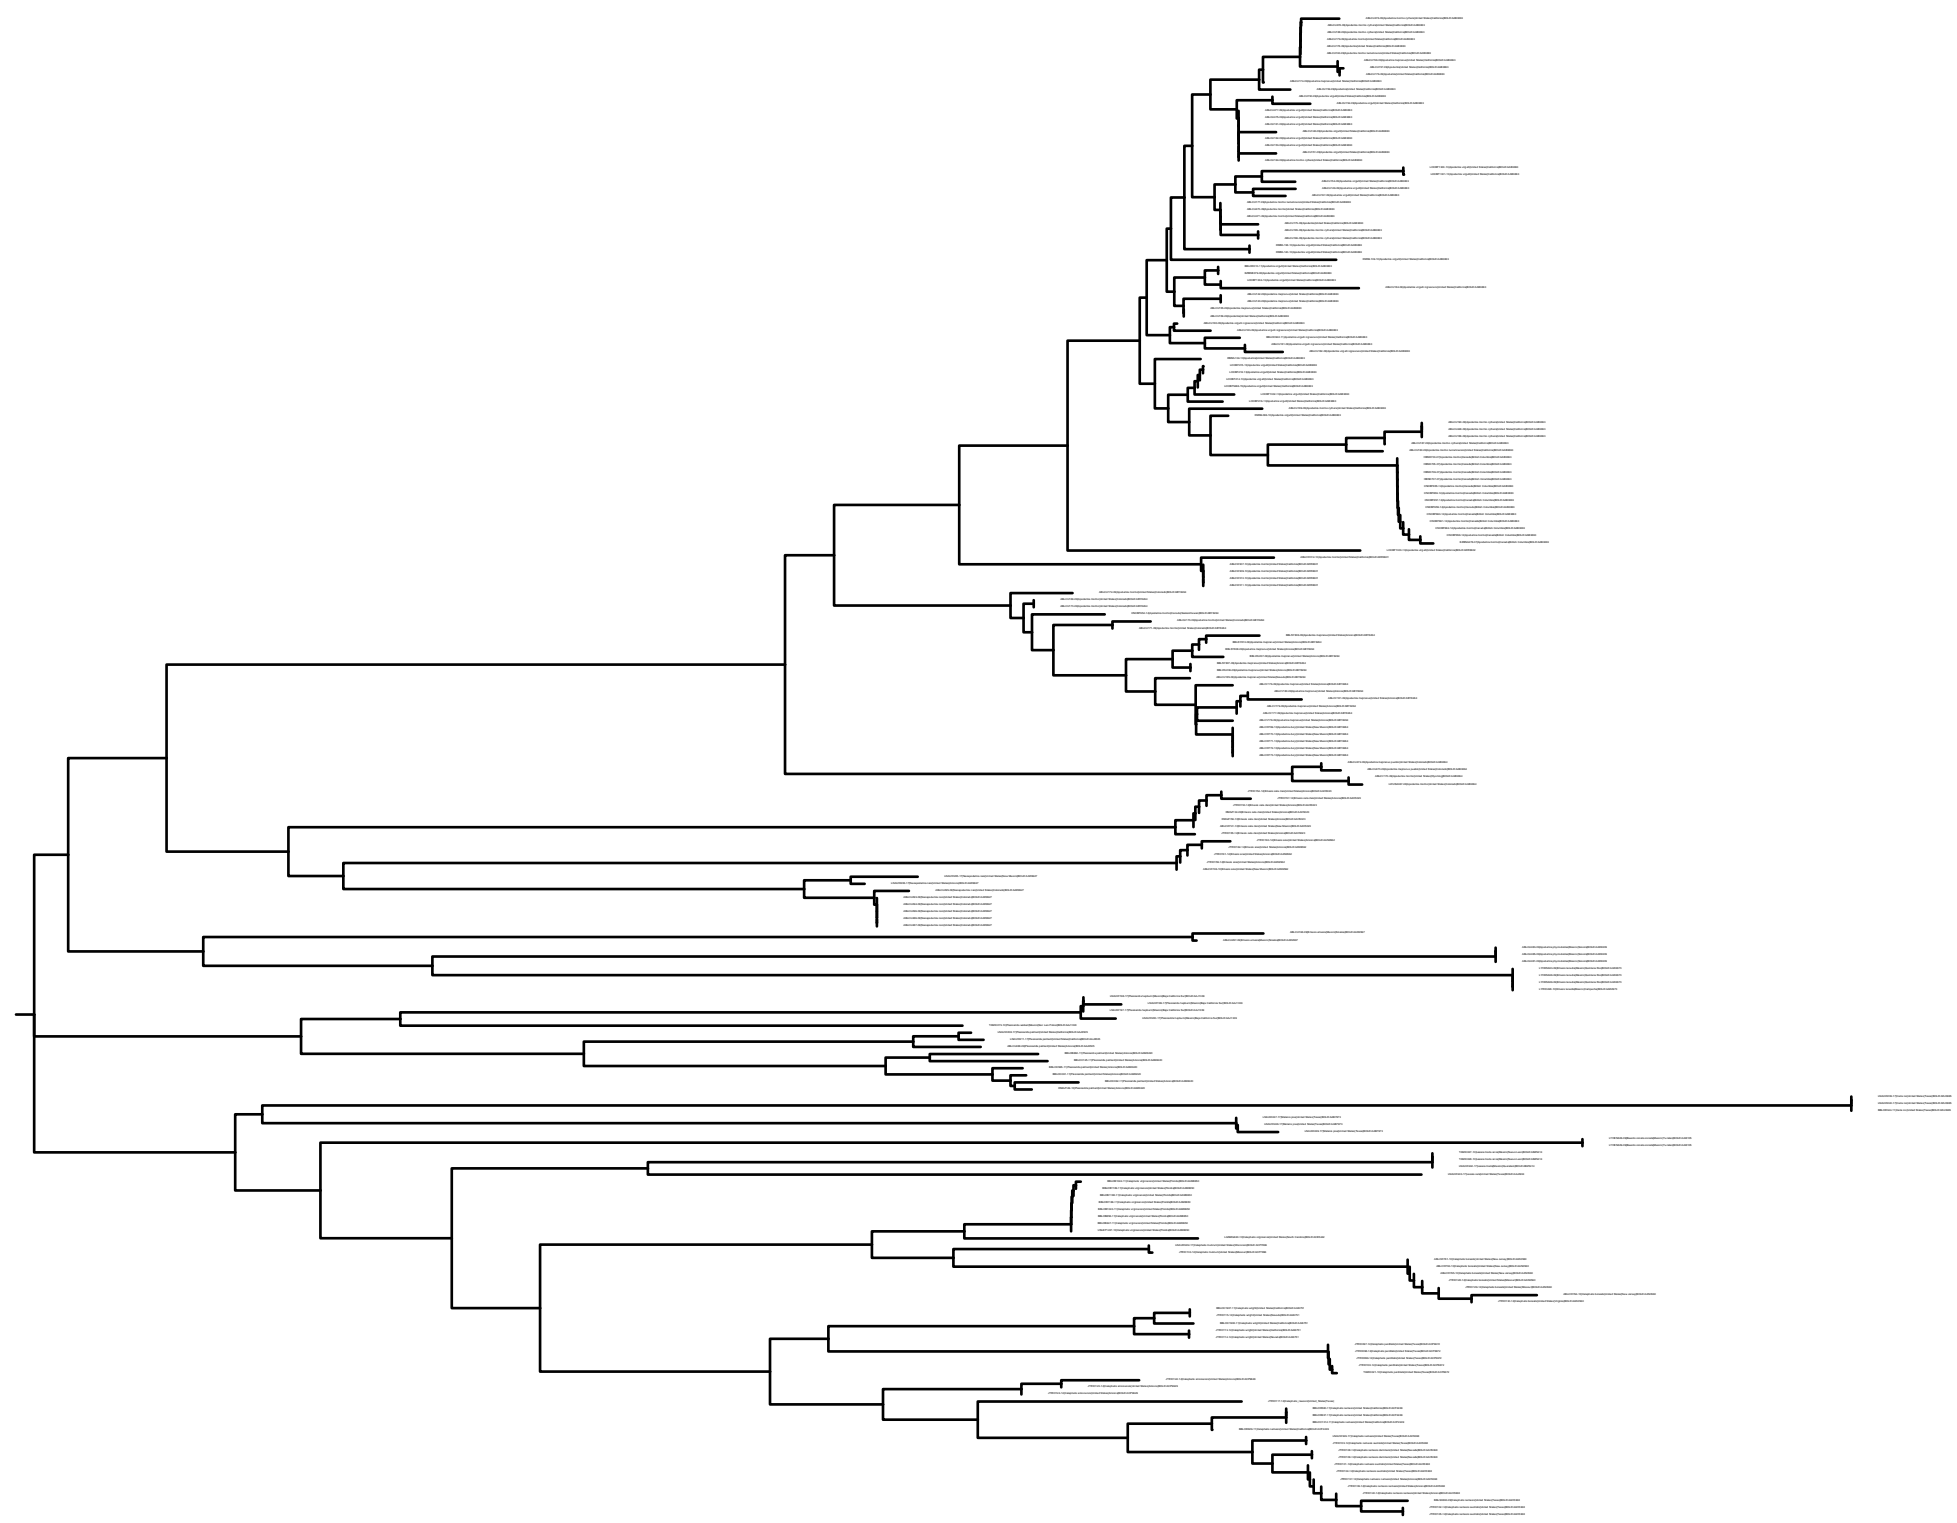

0.008

0.008
