# Supplementary material for: A DNA barcode library for the butterflies of North America
Source: PeerJ journal article supplement (doi:10.7717/peerj.11157), 2021-04-19

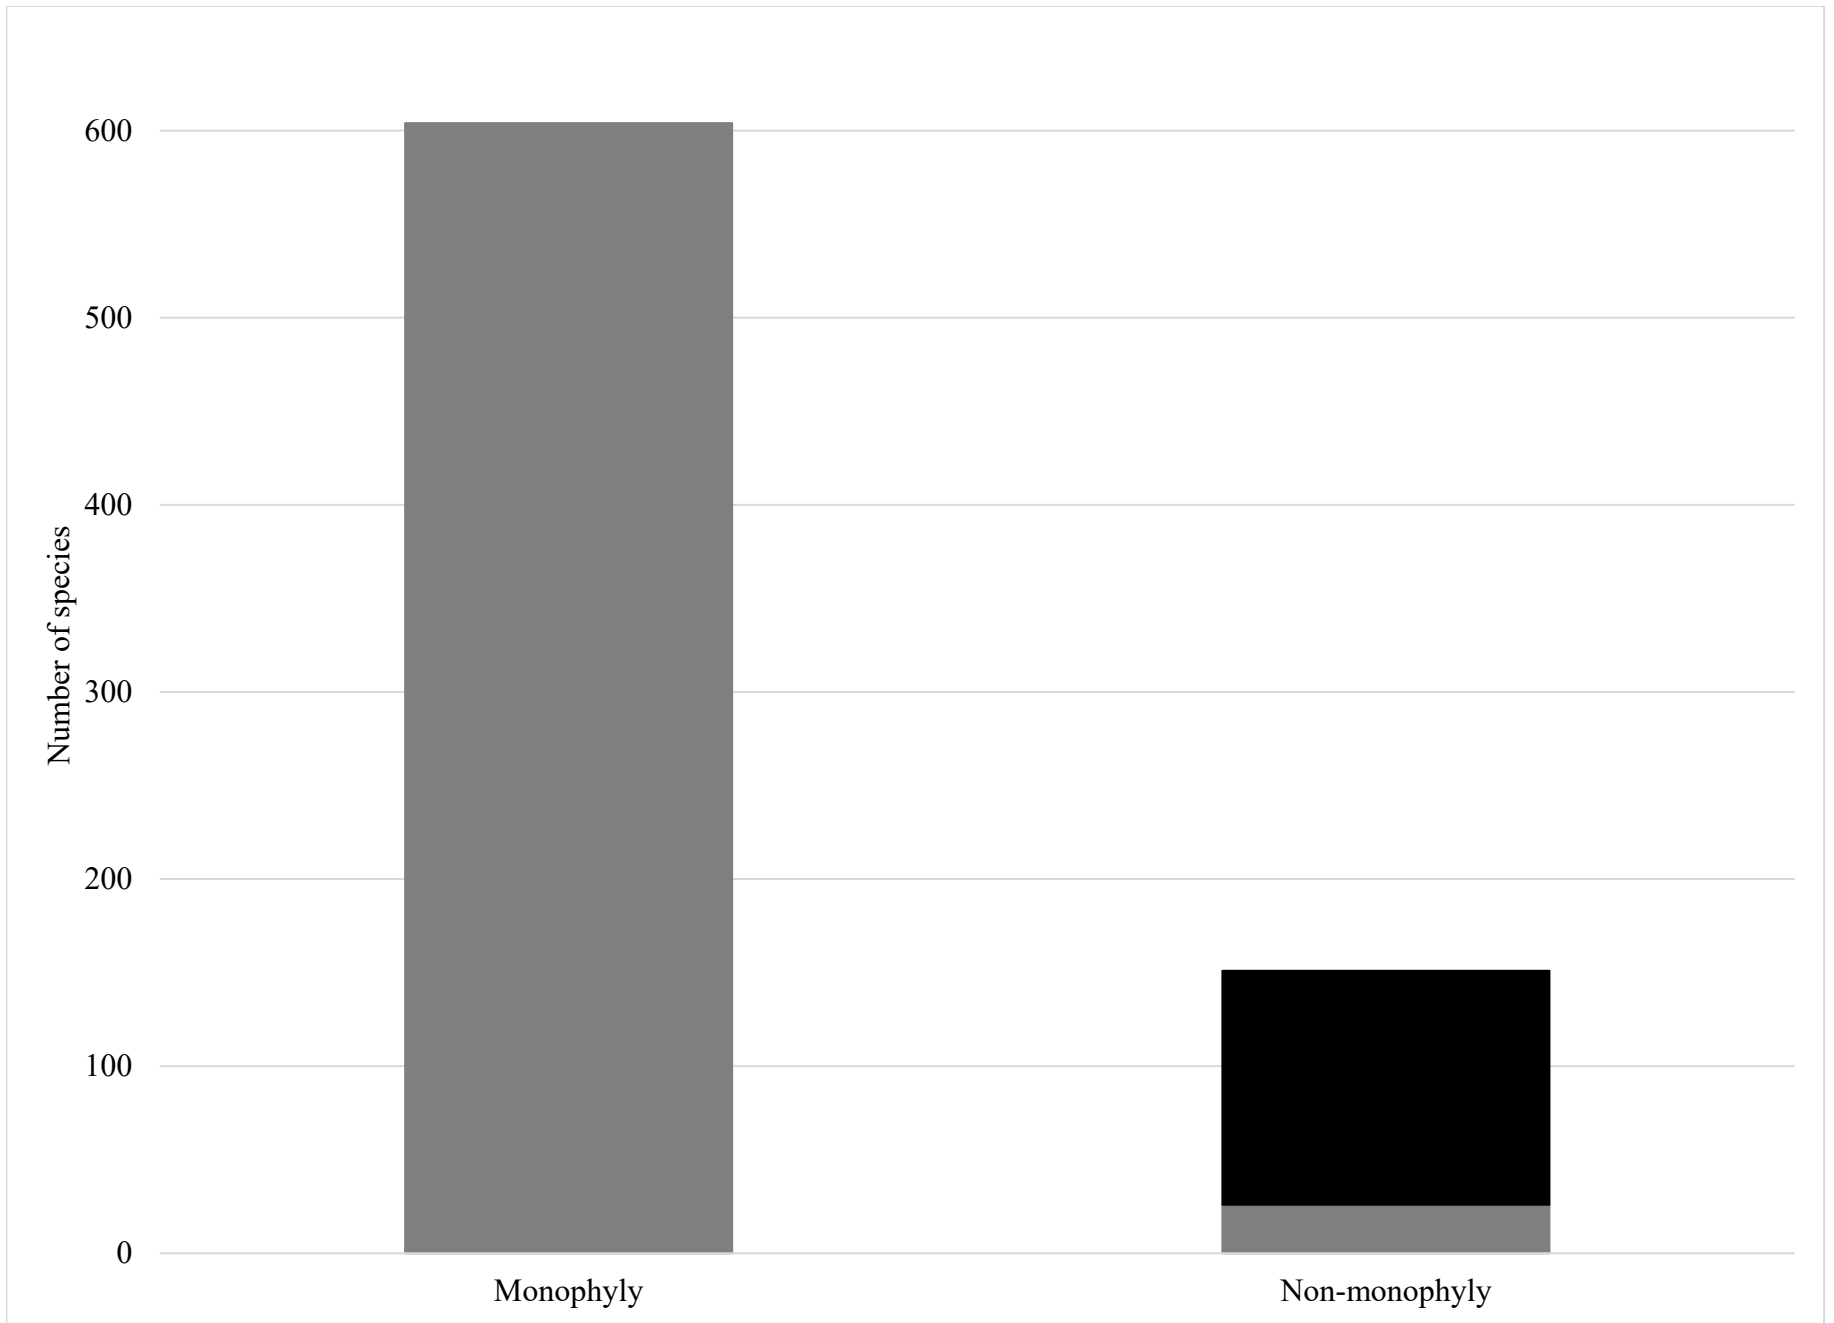

Supplement: Supplemental_figure_S13.pdf [file Supplemental_figure_S13.pdf]
