# Supplementary material for: A DNA barcode library for the butterflies of North America
Source: PeerJ. 2021 Apr 19;9:e11157. doi: 10.7717/peerj.11157 (PMC8061581; doi:10.7717/peerj.11157)
Supplement: Table S2 — Intraspecific and Nearest-Neighbor (N-N) distances were calculated using the “K80” distance metric; red font indicates intraspecific distance values greater than 2.5%; blue font indicates N-N distances lower than 2.5%; ND = No data; MOTUs were placed in the categories Match, Split, Merge, and Mixture following the definition described in the “Methods” section. Species were arranged by family and species. [file peerj-09-11157-s016.xlsx]

## Sheet: Sheet1
Family	Species	Maximum intraspecific distance (%)	Nearest neighbor distance (%)	BIN	GMYC	Monophyly
Hesperiidae	Achalarus albociliatus	0.15	5.57	Match	Match	Monophyletic
Hesperiidae	Achalarus casica	0	3.14	Match	Match	Monophyletic
Hesperiidae	Achalarus jalapus	3.31	3.61	Split	Match	Monophyletic
Hesperiidae	Achalarus lyciades	0.36	3.14	Match	Match	Monophyletic
Hesperiidae	Achalarus toxeus	1.55	3.61	Split	Match	Monophyletic
Hesperiidae	Achlyodes pallida	0.31	8.75	Match	Match	Monophyletic
Hesperiidae	Adopaeoides prittwitzi	0	8.83	Match	Match	Monophyletic
Hesperiidae	Agathymus aryxna	ND	1.43	Merge	Merge	ND
Hesperiidae	Agathymus baueri	0.15	1.43	Merge	Merge	Monophyletic
Hesperiidae	Agathymus estelleae	ND	3.88	Match	Match	ND
Hesperiidae	Agathymus evansi	0	3.81	Match	Match	Monophyletic
Hesperiidae	Agathymus mariae	ND	3.88	Match	Match	ND
Hesperiidae	Agathymus polingi	ND	3.81	Match	Match	ND
Hesperiidae	Aguna asander	0.77	6.89	Match	Match	Monophyletic
Hesperiidae	Aguna claxon	0.31	7.05	Match	Match	Monophyletic
Hesperiidae	Aguna metophis	0.15	6.72	Match	Match	Monophyletic
Hesperiidae	Amblyscirtes aenus	2.98	0	Mixture	Mixture	Non-monophyletic
Hesperiidae	Amblyscirtes aesculapius	0	4.91	Match	Match	Monophyletic
Hesperiidae	Amblyscirtes alternata	0.48	5.43	Match	Match	Monophyletic
Hesperiidae	Amblyscirtes belli	0.46	4.6	Match	Match	Monophyletic
Hesperiidae	Amblyscirtes carolina	0.18	2.53	Match	Merge	Monophyletic
Hesperiidae	Amblyscirtes cassus	1.08	2.97	Match	Match	Monophyletic
Hesperiidae	Amblyscirtes celia	0.32	3.62	Match	Match	Monophyletic
Hesperiidae	Amblyscirtes elissa	0	3.62	Match	Match	Monophyletic
Hesperiidae	Amblyscirtes eos	0.77	5.5	Match	Match	Monophyletic
Hesperiidae	Amblyscirtes exoteria	0	3.45	Match	Match	Monophyletic
Hesperiidae	Amblyscirtes fimbriata	0.18	6.47	Match	Match	Monophyletic
Hesperiidae	Amblyscirtes hegon	1.08	3.99	Match	Match	Monophyletic
Hesperiidae	Amblyscirtes nereus	1.07	3.63	Match	Match	Monophyletic
Hesperiidae	Amblyscirtes nysa	0.16	5.07	Match	Match	Monophyletic
Hesperiidae	Amblyscirtes oslari	1.05	2.22	Match	Match	Monophyletic
Hesperiidae	Amblyscirtes phylace	0.53	2.22	Match	Match	Monophyletic
Hesperiidae	Amblyscirtes reversa	0.15	2.53	Match	Merge	Monophyletic
Hesperiidae	Amblyscirtes texanae	0	2.97	Match	Match	Monophyletic
Hesperiidae	Amblyscirtes tolteca	3.14	3.94	Split	Split	Monophyletic
Hesperiidae	Amblyscirtes vialis	0.46	0	Merge	Merge	Non-monophyletic
Hesperiidae	Anastrus sempiternus	0.33	7.22	Match	Match	Monophyletic
Hesperiidae	Anatrytone logan	0.64	5.75	Match	Match	Monophyletic
Hesperiidae	Anatrytone mazai	0.62	5.75	Match	Match	Monophyletic
Hesperiidae	Ancyloxypha arene	0	7.1	Match	Match	Monophyletic
Hesperiidae	Ancyloxypha numitor	0.32	7.1	Match	Match	Monophyletic
Hesperiidae	Antigonus emorsa	ND	4.11	Match	Match	ND
Hesperiidae	Antigonus erosus	0	4.11	Match	Match	Monophyletic
Hesperiidae	Apyrrothrix araxes	0.15	9.82	Match	Match	Monophyletic
Hesperiidae	Arteurotia tractipennis	0.16	8.08	Match	Match	Monophyletic
Hesperiidae	Asbolis capucinus	0	7.75	Match	Match	Monophyletic
Hesperiidae	Astraptes alardus	0	5.41	Match	Match	Monophyletic
Hesperiidae	Astraptes alector	0	5.41	Match	Match	Monophyletic
Hesperiidae	Astraptes anaphus	0.15	5.68	Match	Match	Monophyletic
Hesperiidae	Astraptes egregius	0	4.18	Match	Match	Monophyletic
Hesperiidae	Astraptes fulgerator	0.36	6.06	Match	Match	Monophyletic
Hesperiidae	Astraptes talus	0	6.08	Match	Match	Monophyletic
Hesperiidae	Atalopedes campestris	1.7	4.73	Match	Match	Monophyletic
Hesperiidae	Atrytone arogos	3	5.42	Split	Match	Monophyletic
Hesperiidae	Atrytonopsis cestus	ND	4.58	Match	Match	ND
Hesperiidae	Atrytonopsis edwardsi	0	3.77	Match	Match	Monophyletic
Hesperiidae	Atrytonopsis hianna	0.77	0	Merge	Merge	Non-monophyletic
Hesperiidae	Atrytonopsis lunus	0	6.08	Match	Match	Monophyletic
Hesperiidae	Atrytonopsis margarita	ND	0.32	Merge	Merge	ND
Hesperiidae	Atrytonopsis pittacus	0	3.77	Match	Match	Monophyletic
Hesperiidae	Atrytonopsis python	0.18	0.32	Merge	Merge	Monophyletic
Hesperiidae	Atrytonopsis quinteri	0	0	Merge	Merge	Non-monophyletic
Hesperiidae	Atrytonopsis vierecki	1.39	4.42	Match	Match	Monophyletic
Hesperiidae	Autochton cellus	3.63	5.06	Split	Split	Monophyletic
Hesperiidae	Autochton cincta	0	4.43	Match	Match	Monophyletic
Hesperiidae	Autochton pseudocellus	0.77	3.62	Match	Match	Monophyletic
Hesperiidae	Bolla brennus	ND	11.03	Match	Match	ND
Hesperiidae	Bolla clytius	0	8.56	Match	Match	Monophyletic
Hesperiidae	Cabares potrillo	0.15	10.04	Match	Match	Monophyletic
Hesperiidae	Calpodes ethlius	0.18	6.26	Match	Match	Monophyletic
Hesperiidae	Carrhenes canescens	0.31	6.48	Match	Match	Monophyletic
Hesperiidae	Carterocephalus palaemon	0.63	8	Match	Match	Monophyletic
Hesperiidae	Celaenorrhinus fritzgaertneri	ND	8.25	Match	Match	ND
Hesperiidae	Celaenorrhinus stallingsi	ND	8.25	Match	Match	ND
Hesperiidae	Celotes limpia	0.15	5.25	Match	Match	Monophyletic
Hesperiidae	Celotes nessus	0.46	5.25	Match	Match	Monophyletic
Hesperiidae	Chioides albofasciatus	0.16	6.16	Match	Match	Monophyletic
Hesperiidae	Chioides zilpa	0.92	6.23	Match	Match	Monophyletic
Hesperiidae	Chiomara georgina	0.16	6.4	Match	Match	Monophyletic
Hesperiidae	Chiomara mithrax	4.94	9.27	Split	Split	Monophyletic
Hesperiidae	Codatractus alcaeus	4.86	6.55	Split	Split	Monophyletic
Hesperiidae	Codatractus arizonensis	3.31	6.55	Split	Split	Monophyletic
Hesperiidae	Codatractus valeriana	ND	8.77	Match	Match	ND
Hesperiidae	Cogia caicus	0.18	5.55	Match	Match	Monophyletic
Hesperiidae	Cogia calchas	0	5.24	Match	Match	Monophyletic
Hesperiidae	Cogia hippalus	0.93	2.66	Match	Match	Monophyletic
Hesperiidae	Cogia outis	1.08	2.66	Match	Match	Monophyletic
Hesperiidae	Conga chydaea	0	4.81	Match	Match	Monophyletic
Hesperiidae	Copaeodes aurantiaca	4.12	5.13	Split	Split	Monophyletic
Hesperiidae	Copaeodes minima	0.18	6.38	Match	Match	Monophyletic
Hesperiidae	Corticea corticea	0.16	9.11	Match	Match	Monophyletic
Hesperiidae	Cymaenes trebius	0.46	1.39	Merge	Merge	Monophyletic
Hesperiidae	Cymaenes tripunctus	0	1.39	Merge	Merge	Monophyletic
Hesperiidae	Eantis tamenund	0.15	8.75	Match	Match	Monophyletic
Hesperiidae	Epargyreus clarus	3.25	3.24	Match	Match	Monophyletic
Hesperiidae	Epargyreus exadeus	0	3.24	Match	Match	Monophyletic
Hesperiidae	Epargyreus zestos	0	4.66	Match	Match	Monophyletic
Hesperiidae	Ephyriades brunnea	0.15	6.88	Match	Match	Monophyletic
Hesperiidae	Erynnis afranius	0.15	0	Merge	Merge	Non-monophyletic
Hesperiidae	Erynnis baptisiae	0.16	0	Merge	Merge	Non-monophyletic
Hesperiidae	Erynnis brizo	4.13	2.61	Split	Split	Monophyletic
Hesperiidae	Erynnis funeralis	0.34	0	Merge	Merge	Monophyletic
Hesperiidae	Erynnis horatius	0.77	0	Merge	Merge	Non-monophyletic
Hesperiidae	Erynnis icelus	1.08	2.61	Match	Match	Monophyletic
Hesperiidae	Erynnis juvenalis	0.82	1.63	Match	Merge	Monophyletic
Hesperiidae	Erynnis lucilius	0.77	0	Merge	Merge	Non-monophyletic
Hesperiidae	Erynnis martialis	2.65	4.57	Match	Match	Monophyletic
Hesperiidae	Erynnis meridianus	0.86	0	Merge	Merge	Non-monophyletic
Hesperiidae	Erynnis pacuvius	0.8	4.71	Match	Match	Monophyletic
Hesperiidae	Erynnis persius	7.11	0.15	Mixture	Mixture	Non-monophyletic
Hesperiidae	Erynnis propertius	7.69	0	Mixture	Mixture	Monophyletic
Hesperiidae	Erynnis scudderi	0	3.49	Match	Match	Monophyletic
Hesperiidae	Erynnis telemachus	1.39	1.63	Match	Merge	Monophyletic
Hesperiidae	Erynnis tristis	0.43	3.74	Match	Match	Monophyletic
Hesperiidae	Erynnis zarucco	0.31	0	Merge	Merge	Non-monophyletic
Hesperiidae	Euphyes arpa	0.15	1.87	Match	Merge	Monophyletic
Hesperiidae	Euphyes berryi	ND	3.14	Match	Match	ND
Hesperiidae	Euphyes bimacula	0.62	1.87	Match	Merge	Monophyletic
Hesperiidae	Euphyes conspicua	0.15	3.87	Match	Match	Monophyletic
Hesperiidae	Euphyes dion	1.52	3.14	Split	Match	Monophyletic
Hesperiidae	Euphyes dukesi	0.93	3.69	Match	Match	Monophyletic
Hesperiidae	Euphyes pilatka	0.15	4.44	Match	Match	Monophyletic
Hesperiidae	Euphyes vestris	1.71	2.17	Match	Match	Monophyletic
Hesperiidae	Gesta invisus	0	6.29	Match	Match	Monophyletic
Hesperiidae	Gorgythion begga	0.31	6.4	Match	Match	Monophyletic
Hesperiidae	Grais stigmaticus	5.54	9.18	Split	Split	Monophyletic
Hesperiidae	Heliopetes alana	0	4.42	Match	Match	Monophyletic
Hesperiidae	Heliopetes arsalte	0	4.42	Match	Match	Monophyletic
Hesperiidae	Heliopetes ericetorum	0	3.62	Match	Match	Monophyletic
Hesperiidae	Heliopetes laviana	0.15	3.62	Match	Match	Monophyletic
Hesperiidae	Heliopetes macaira	0	8.76	Match	Match	Monophyletic
Hesperiidae	Heliopyrgus domicella	0	2.52	Match	Merge	Monophyletic
Hesperiidae	Heliopyrgus sublinea	ND	2.52	Match	Merge	ND
Hesperiidae	Hesperia assiniboia	1.39	0	Merge	Merge	Non-monophyletic
Hesperiidae	Hesperia attalus	0.77	1.43	Match	Merge	Monophyletic
Hesperiidae	Hesperia colorado	1.97	0	Merge	Merge	Non-monophyletic
Hesperiidae	Hesperia columbia	0	1.71	Match	Merge	Monophyletic
Hesperiidae	Hesperia comma	4.12	0	Merge	Mixture	Non-monophyletic
Hesperiidae	Hesperia dacotae	0.61	2.5	Match	Match	Monophyletic
Hesperiidae	Hesperia juba	0.77	1.85	Match	Match	Monophyletic
Hesperiidae	Hesperia leonardus	0.46	1.61	Match	Merge	Monophyletic
Hesperiidae	Hesperia lindseyi	1.08	2.67	Match	Match	Monophyletic
Hesperiidae	Hesperia meskei	0.15	2.15	Match	Match	Monophyletic
Hesperiidae	Hesperia metea	0.93	1.39	Match	Merge	Non-monophyletic
Hesperiidae	Hesperia miriamae	ND	2.98	Match	Match	ND
Hesperiidae	Hesperia nevada	2.34	2.98	Split	Match	Monophyletic
Hesperiidae	Hesperia ottoe	0	1.61	Match	Match	Monophyletic
Hesperiidae	Hesperia pahaska	0.15	1.87	Match	Match	Monophyletic
Hesperiidae	Hesperia sassacus	0.8	2.69	Match	Match	Monophyletic
Hesperiidae	Hesperia uncas	0.47	2.26	Match	Match	Monophyletic
Hesperiidae	Hesperia viridis	0	1.39	Match	Merge	Monophyletic
Hesperiidae	Hesperia woodgatei	0.15	2.66	Match	Match	Monophyletic
Hesperiidae	Hesperopsis alpheus	0.31	0	Merge	Merge	Non-monophyletic
Hesperiidae	Hesperopsis gracielae	0.15	0	Merge	Merge	Non-monophyletic
Hesperiidae	Hesperopsis libya	1.87	5.4	Match	Match	Monophyletic
Hesperiidae	Hylephila phyleus	1.27	4.19	Match	Match	Monophyletic
Hesperiidae	Lerema accius	0.15	1.82	Match	Merge	Monophyletic
Hesperiidae	Lerema liris	0.94	1.82	Match	Merge	Monophyletic
Hesperiidae	Lerodea arabus	ND	7.35	Match	Match	ND
Hesperiidae	Lerodea eufala	0.35	5.21	Match	Match	Monophyletic
Hesperiidae	Megathymus cofaqui	0.71	3.46	Match	Match	Monophyletic
Hesperiidae	Megathymus streckeri	0.77	3.46	Match	Match	Monophyletic
Hesperiidae	Megathymus ursus	ND	8.84	Match	Match	ND
Hesperiidae	Megathymus yuccae	1.55	6.65	Split	Match	Monophyletic
Hesperiidae	Mnasilus allubita	0	7.1	Match	Match	Monophyletic
Hesperiidae	Monca crispinus	ND	7.41	Match	Match	ND
Hesperiidae	Mylon pelopidas	0	7.22	Match	Match	Monophyletic
Hesperiidae	Nastra julia	0.77	6.07	Match	Match	Monophyletic
Hesperiidae	Nastra lherminier	0.46	6.07	Match	Match	Monophyletic
Hesperiidae	Nastra neamathla	0.31	2.17	Match	Match	Monophyletic
Hesperiidae	Nisoniades rubescens	3.94	6.05	Split	Split	Monophyletic
Hesperiidae	Noctuana stator	0.16	9.3	Match	Match	Monophyletic
Hesperiidae	Notamblyscirtes simius	2.65	5.72	Match	Match	Monophyletic
Hesperiidae	Nyctelius nyctelius	0.15	5.78	Match	Match	Monophyletic
Hesperiidae	Oarisma edwardsii	1.09	5.13	Match	Match	Monophyletic
Hesperiidae	Oarisma garita	1.62	1.82	Merge	Match	Monophyletic
Hesperiidae	Oarisma poweshiek	0.18	1.82	Merge	Match	Monophyletic
Hesperiidae	Ochlodes agricola	0.46	3.73	Match	Split	Monophyletic
Hesperiidae	Ochlodes sylvanoides	1.08	4.65	Match	Match	Monophyletic
Hesperiidae	Ochlodes yuma	1.39	5.38	Match	Match	Monophyletic
Hesperiidae	Oligoria maculata	0.31	5.43	Match	Match	Monophyletic
Hesperiidae	Panoquina errans	0.15	1.89	Match	Merge	Monophyletic
Hesperiidae	Panoquina evansi	0	4.26	Match	Match	Monophyletic
Hesperiidae	Panoquina hecebolus	0.15	0	Merge	Merge	Non-monophyleticphyletic
Hesperiidae	Panoquina lucas	0	0	Merge	Merge	Monophyletic
Hesperiidae	Panoquina ocola	0.62	2.81	Match	Match	Monophyletic
Hesperiidae	Panoquina panoquin	1.08	2.07	Match	Match	Monophyletic
Hesperiidae	Panoquina panoquinoides	0.56	1.89	Match	Merge	Monophyletic
Hesperiidae	Paratrytone snowi	0.15	6.73	Match	Match	Monophyletic
Hesperiidae	Pellicia arina	1.08	6.05	Match	Match	Monophyletic
Hesperiidae	Pellicia dimidiata	0	6.73	Match	Match	Monophyletic
Hesperiidae	Perichares adela	0	8.01	Match	Match	Monophyletic
Hesperiidae	Phocides belus	0.48	3.47	Match	Match	Monophyletic
Hesperiidae	Phocides pigmalion	0	3.47	Match	Match	Monophyletic
Hesperiidae	Phocides polybius	0	6.89	Match	Match	Monophyletic
Hesperiidae	Pholisora catullus	2.65	0.93	Merge	Merge	Monophyletic
Hesperiidae	Pholisora mejicanus	0.54	0.93	Merge	Merge	Monophyletic
Hesperiidae	Piruna aea	0.18	6.28	Match	Match	Monophyletic
Hesperiidae	Piruna penaea	ND	6.09	Match	Match	ND
Hesperiidae	Piruna pirus	1.08	6.09	Match	Match	Monophyletic
Hesperiidae	Piruna polingii	0.48	6.25	Match	Match	Monophyletic
Hesperiidae	Poanes aaroni	0	2.6	Match	Match	Monophyletic
Hesperiidae	Poanes hobomok	1	2.65	Match	Match	Monophyletic
Hesperiidae	Poanes massasoit	0.32	1.48	Match	Merge	Monophyletic
Hesperiidae	Poanes melane	0	3.6	Match	Match	Monophyletic
Hesperiidae	Poanes taxiles	0.15	2.65	Match	Match	Monophyletic
Hesperiidae	Poanes viator	0.46	1.48	Match	Merge	Monophyletic
Hesperiidae	Poanes yehl	0.32	2.6	Match	Match	Monophyletic
Hesperiidae	Poanes zabulon	0.52	3.1	Match	Match	Monophyletic
Hesperiidae	Polites baracoa	0.46	3.66	Match	Match	Monophyletic
Hesperiidae	Polites draco	1.4	0.46	Merge	Merge	Non-monophyletic
Hesperiidae	Polites mardon	0.31	0.73	Merge	Merge	Monophyletic
Hesperiidae	Polites mystic	0.7	0	Merge	Merge	Non-monophyletic
Hesperiidae	Polites origenes	0.72	3	Match	Match	Monophyletic
Hesperiidae	Polites peckius	4.1	0.99	Mixture	Split	Non-monophyletic
Hesperiidae	Polites rhesus	0.18	2.59	Match	Match	Monophyletic
Hesperiidae	Polites sabuleti	1.71	0.46	Merge	Merge	Non-monophyletic
Hesperiidae	Polites sonora	0.7	0	Merge	Merge	Non-monophyletic
Hesperiidae	Polites themistocles	1.87	1.5	Match	Match	Monophyletic
Hesperiidae	Polites vibex	2.84	4.56	Split	Match	Monophyletic
Hesperiidae	Polygonus leo	2.34	4.6	Split	Match	Monophyletic
Hesperiidae	Polygonus savigny	0.46	4.6	Match	Match	Monophyletic
Hesperiidae	Polythrix mexicanus	0.15	10.85	Match	Match	Monophyletic
Hesperiidae	Polythrix octomaculata	0	9.3	Match	Match	Monophyletic
Hesperiidae	Pompeius verna	4.79	6.59	Split	Split	Monophyletic
Hesperiidae	Problema bulenta	0.46	4.12	Match	Match	Monophyletic
Hesperiidae	Problema byssus	0.77	4.12	Match	Match	Monophyletic
Hesperiidae	Proteides mercurius	2.99	9.1	Match	Match	Monophyletic
Hesperiidae	Pseudocopaeodes eunus	0.62	4.56	Match	Match	Monophyletic
Hesperiidae	Pyrgus albescens	0.38	0	Merge	Merge	Non-monophyletic
Hesperiidae	Pyrgus centaureae	2.17	4.57	Match	Match	Monophyletic
Hesperiidae	Pyrgus communis	0.46	0	Merge	Merge	Non-monophyletic
Hesperiidae	Pyrgus oileus	0.92	5.29	Match	Match	Monophyletic
Hesperiidae	Pyrgus philetas	2.81	5	Split	Match	Monophyletic
Hesperiidae	Pyrgus ruralis	0.31	2.89	Match	Match	Monophyletic
Hesperiidae	Pyrgus scriptura	0	4.57	Match	Match	Monophyletic
Hesperiidae	Pyrgus xanthus	0.17	2.89	Match	Match	Monophyletic
Hesperiidae	Quasimellana eulogius	ND	7.39	Match	Match	ND
Hesperiidae	Rhinthon osca	0	8.1	Match	Match	Monophyletic
Hesperiidae	Saliana esperi	0.31	8.62	Match	Match	Monophyletic
Hesperiidae	Sostrata nordica	0	8.95	Match	Match	Monophyletic
Hesperiidae	Spathilepia clonius	0.77	8.24	Match	Match	Monophyletic
Hesperiidae	Stallingsia maculosus	0	5.89	Match	Match	Monophyletic
Hesperiidae	Staphylus ceos	1.08	6.38	Match	Match	Monophyletic
Hesperiidae	Staphylus hayhurstii	1.08	3.77	Match	Match	Monophyletic
Hesperiidae	Staphylus mazans	0	3.77	Match	Match	Monophyletic
Hesperiidae	Stinga morrisoni	0	5.23	Match	Match	Monophyletic
Hesperiidae	Synapte pecta	0.46	3.14	Match	Match	Monophyletic
Hesperiidae	Synapte salenus	0.15	3.14	Match	Match	Monophyletic
Hesperiidae	Systasea pulverulenta	0.34	3.28	Match	Match	Monophyletic
Hesperiidae	Systasea zampa	0	3.28	Match	Match	Monophyletic
Hesperiidae	Thespieus macareus	0.31	5.68	Match	Match	Monophyletic
Hesperiidae	Thorybes bathyllus	0.6	3.45	Match	Match	Monophyletic
Hesperiidae	Thorybes confusis	0.15	4.9	Match	Match	Monophyletic
Hesperiidae	Thorybes diversus	0.15	3.77	Match	Match	Monophyletic
Hesperiidae	Thorybes drusius	ND	2.82	Match	Match	ND
Hesperiidae	Thorybes mexicana	1.96	4.29	Split	Match	Monophyletic
Hesperiidae	Thorybes pylades	2.81	2.82	Split	Split	Monophyletic
Hesperiidae	Thymelicus lineola	0.55	5.48	Match	Match	Monophyletic
Hesperiidae	Timochares ruptifasciata	0.89	9.4	Match	Match	Monophyletic
Hesperiidae	Typhedanus undulatus	0	5.24	Match	Match	Monophyletic
Hesperiidae	Urbanus belli	0	2.98	Match	Merge	Monophyletic
Hesperiidae	Urbanus dorantes	0.35	3.61	Match	Match	Monophyletic
Hesperiidae	Urbanus doryssus	0.93	4.59	Match	Match	Monophyletic
Hesperiidae	Urbanus esmeraldus	ND	6.56	Match	Match	ND
Hesperiidae	Urbanus procne	0	5.4	Match	Match	Monophyletic
Hesperiidae	Urbanus pronus	0	3.45	Match	Match	Monophyletic
Hesperiidae	Urbanus proteus	0.32	4.58	Match	Match	Monophyletic
Hesperiidae	Urbanus simplicius	ND	5.88	Match	Match	ND
Hesperiidae	Urbanus tanna	0.18	0.46	Merge	Merge	Monophyletic
Hesperiidae	Urbanus teleus	2.18	0.46	Merge	Merge	Non-monophyletic
Hesperiidae	Urbanus viterboana	0.31	2.98	Match	Merge	Monophyletic
Hesperiidae	Vettius fantasos	0.46	7.05	Match	Match	Monophyletic
Hesperiidae	Vidius perigenes	0.35	6.66	Match	Match	Monophyletic
Hesperiidae	Wallengrenia egeremet	0.62	1.55	Match	Merge	Monophyletic
Hesperiidae	Wallengrenia otho	0.15	1.55	Match	Merge	Monophyletic
Hesperiidae	Xenophanes tryxus	0	6.89	Match	Match	Monophyletic
Hesperiidae	Zestusa dorus	0.31	8.58	Match	Match	Monophyletic
Lycaenidae	Agriades glandon	3.31	0.62	Merge	Mixture	Non-monophyletic
Lycaenidae	Agriades optilete	0.47	3.32	Match	Match	Monophyletic
Lycaenidae	Agriades podarce	1.68	0.62	Merge	Merge	Non-monophyletic
Lycaenidae	Allosmaitia strophius	0.33	5.26	Match	Match	Monophyletic
Lycaenidae	Arawacus jada	0	5.01	Match	Match	Monophyletic
Lycaenidae	Atlides halesus	2.34	6.28	Match	Split	Monophyletic
Lycaenidae	Brephidium exilis	0.46	0.15	Merge	Merge	Monophyletic
Lycaenidae	Brephidium pseudofea	ND	0.15	Merge	Merge	ND
Lycaenidae	Callophrys affinis	0.46	0	Merge	Merge	Non-monophyletic
Lycaenidae	Callophrys augustinus	1.79	0	Merge	Mixture	Non-monophyletic
Lycaenidae	Callophrys dumetorum	0.36	0	Merge	Merge	Non-monophyletic
Lycaenidae	Callophrys eryphon	0	1.13	Match	Match	Monophyletic
Lycaenidae	Callophrys fotis	0.46	0	Merge	Merge	Non-monophyletic
Lycaenidae	Callophrys gryneus	1.87	0	Merge	Mixture	Non-monophyletic
Lycaenidae	Callophrys henrici	0.54	0.31	Merge	Merge	Non-monophyletic
Lycaenidae	Callophrys hesseli	0	2.54	Match	Match	Monophyletic
Lycaenidae	Callophrys irus	0.46	1.08	Merge	Match	Monophyletic
Lycaenidae	Callophrys johnsoni	0	2.37	Match	Match	Monophyletic
Lycaenidae	Callophrys lanoraieensis	0.18	1	Merge	Match	Monophyletic
Lycaenidae	Callophrys mcfarlandi	0	1.06	Merge	Match	Monophyletic
Lycaenidae	Callophrys mossii	0.62	0	Merge	Merge	Non-monophyletic
Lycaenidae	Callophrys muiri	0.15	0	Merge	Merge	Non-monophyletic
Lycaenidae	Callophrys niphon	0.35	1.13	Match	Match	Monophyletic
Lycaenidae	Callophrys polios	0.46	1	Merge	Match	Monophyletic
Lycaenidae	Callophrys sheridanii	3.62	0	Mixture	Mixture	Non-monophyletic
Lycaenidae	Callophrys spinetorum	0	2.6	Match	Match	Monophyletic
Lycaenidae	Callophrys viridis	ND	0	Merge	Merge	ND
Lycaenidae	Callophrys xami	0.15	2.18	Match	Match	Monophyletic
Lycaenidae	Calycopis cecrops	3.06	0.15	Mixture	Mixture	Non-monophyletic
Lycaenidae	Calycopis isobeon	0.31	0.15	Merge	Merge	Non-monophyletic
Lycaenidae	Celastrina echo	0	0	Merge	Merge	Non-monophyletic
Lycaenidae	Celastrina humulus	0.15	0	Merge	Merge	Non-monophyletic
Lycaenidae	Celastrina idella	0.31	0	Merge	Merge	Non-monophyletic
Lycaenidae	Celastrina ladon	0.48	0	Merge	Merge	Non-monophyletic
Lycaenidae	Celastrina lucia	0.39	0	Merge	Merge	Non-monophyletic
Lycaenidae	Celastrina neglecta	0.16	0	Merge	Merge	Non-monophyletic
Lycaenidae	Celastrina neglectamajor	0.15	0	Merge	Merge	Non-monophyletic
Lycaenidae	Celastrina nigra	0.15	0	Merge	Merge	Non-monophyletic
Lycaenidae	Celastrina serotina	0	0	Merge	Merge	Non-monophyletic
Lycaenidae	Chlorostrymon simaethis	ND	5.23	Match	Match	ND
Lycaenidae	Chlorostrymon telea	0.34	6.52	Match	Match	Monophyletic
Lycaenidae	Cupido amyntula	1.51	1.19	Match	Split	Monophyletic
Lycaenidae	Cupido comyntas	1.08	1.19	Match	Match	Monophyletic
Lycaenidae	Cyanophrys herodotus	0.62	3	Match	Match	Monophyletic
Lycaenidae	Cyanophrys miserabilis	0	3.63	Match	Match	Monophyletic
Lycaenidae	Cyclargus ammon	0.77	0.46	Merge	Merge	Non-monophyletic
Lycaenidae	Cyclargus thomasi	0.31	0.46	Merge	Merge	Monophyletic
Lycaenidae	Echinargus isola	0.31	5.73	Match	Match	Monophyletic
Lycaenidae	Electrostrymon angelia	0	4.59	Match	Match	Monophyletic
Lycaenidae	Electrostrymon hugon	0.31	4.4	Match	Match	Monophyletic
Lycaenidae	Electrostrymon joya	0.17	4.4	Match	Match	Monophyletic
Lycaenidae	Erora laeta	0.15	0.93	Merge	Merge	Monophyletic
Lycaenidae	Erora quaderna	0	0.93	Merge	Merge	Monophyletic
Lycaenidae	Eumaeus atala	0	4.44	Match	Match	Monophyletic
Lycaenidae	Eumaeus toxea	0.15	4.44	Match	Match	Monophyletic
Lycaenidae	Euphilotes ancilla	3.78	0	Mixture	Mixture	Non-monophyletic
Lycaenidae	Euphilotes battoides	3.95	0	Mixture	Mixture	Non-monophyletic
Lycaenidae	Euphilotes baueri	1.71	0	Merge	Mixture	Non-monophyletic
Lycaenidae	Euphilotes bernardino	1.24	0	Merge	Merge	Non-monophyletic
Lycaenidae	Euphilotes centralis	0	0.15	Merge	Merge	Monophyletic
Lycaenidae	Euphilotes columbiae	ND	0.15	Merge	Match	ND
Lycaenidae	Euphilotes ellisii	0.31	0.93	Merge	Merge	Monophyletic
Lycaenidae	Euphilotes enoptes	1.78	0	Merge	Mixture	Non-monophyletic
Lycaenidae	Euphilotes glaucon	3.62	0	Mixture	Mixture	Non-monophyletic
Lycaenidae	Euphilotes mojave	2.5	0	Merge	Mixture	Non-monophyletic
Lycaenidae	Euphilotes pallescens	0.64	0.31	Merge	Merge	Monophyletic
Lycaenidae	Euphilotes rita	2.19	0.15	Merge	Mixture	Non-monophyletic
Lycaenidae	Euphilotes spaldingi	0.77	0.31	Merge	Merge	Monophyletic
Lycaenidae	Euphilotes stanfordorum	3.48	0	Mixture	Mixture	Non-monophyletic
Lycaenidae	Feniseca tarquinius	1.65	14.27	Match	Match	Monophyletic
Lycaenidae	Glaucopsyche lygdamus	2.5	3.47	Match	Split	Monophyletic
Lycaenidae	Glaucopsyche piasus	1.55	2.97	Match	Split	Monophyletic
Lycaenidae	Habrodais grunus	0.36	3.47	Match	Match	Monophyletic
Lycaenidae	Hemiargus ceraunus	2.34	5.81	Match	Split	Monophyletic
Lycaenidae	Hypaurotis crysalus	0.42	3.47	Match	Match	Monophyletic
Lycaenidae	Hypostrymon critola	1.55	4.81	Match	Split	Monophyletic
Lycaenidae	Icaricia acmon	3.64	0	Merge	Mixture	Non-monophyletic
Lycaenidae	Icaricia cotundra	1.24	0	Merge	Mixture	Non-monophyletic
Lycaenidae	Icaricia icarioides	4.96	3.62	Split	Split	Monophyletic
Lycaenidae	Icaricia lupini	3.31	0	Merge	Mixture	Non-monophyletic
Lycaenidae	Icaricia neurona	0.92	0.77	Merge	Match	Monophyletic
Lycaenidae	Icaricia saepiolus	3.13	2.97	Match	Split	Monophyletic
Lycaenidae	Icaricia shasta	1.86	2.97	Match	Split	Monophyletic
Lycaenidae	Kisutam syllis	0.15	5.1	Match	Match	Monophyletic
Lycaenidae	Leptotes cassius	0.62	0.46	Merge	Merge	Monophyletic
Lycaenidae	Leptotes marina	0.61	0.46	Merge	Merge	Monophyletic
Lycaenidae	Lycaena arota	1.5	4.47	Split	Match	Monophyletic
Lycaenidae	Lycaena cupreus	1.22	3.57	Match	Match	Monophyletic
Lycaenidae	Lycaena dione	0.83	1.73	Match	Match	Monophyletic
Lycaenidae	Lycaena dorcas	0.47	0	Merge	Merge	Non-monophyletic
Lycaenidae	Lycaena dospassosi	0	0	Merge	Merge	Non-monophyletic
Lycaenidae	Lycaena editha	0.63	1.34	Match	Match	Monophyletic
Lycaenidae	Lycaena epixanthe	0.63	2.49	Match	Match	Monophyletic
Lycaenidae	Lycaena gorgon	1.55	2.53	Split	Match	Monophyletic
Lycaenidae	Lycaena helloides	0.97	0	Merge	Merge	Non-monophyletic
Lycaenidae	Lycaena hermes	0.15	5.09	Match	Match	Monophyletic
Lycaenidae	Lycaena heteronea	0.77	2.53	Match	Match	Monophyletic
Lycaenidae	Lycaena hyllus	0	4.19	Match	Match	Monophyletic
Lycaenidae	Lycaena mariposa	1.24	3.63	Match	Match	Monophyletic
Lycaenidae	Lycaena nivalis	0.31	2.49	Match	Match	Monophyletic
Lycaenidae	Lycaena phlaeas	0.77	4.68	Match	Match	Monophyletic
Lycaenidae	Lycaena rubidus	0.31	2.88	Match	Match	Monophyletic
Lycaenidae	Lycaena xanthoides	0.51	1.34	Match	Match	Monophyletic
Lycaenidae	Michaelus ira	ND	5.06	Match	Match	ND
Lycaenidae	Ministrymon azia	0	5.55	Match	Match	Monophyletic
Lycaenidae	Ministrymon clytie	0	3.45	Match	Match	Monophyletic
Lycaenidae	Ministrymon leda	0.71	3.45	Match	Match	Monophyletic
Lycaenidae	Ocaria ocrisia	ND	5.18	Match	Match	ND
Lycaenidae	Oenomaus ortygnus	0	5.39	Match	Match	Monophyletic
Lycaenidae	Panthiades bathildis	0	4.86	Match	Match	Monophyletic
Lycaenidae	Parrhasius m-album	0.46	4.42	Match	Match	Monophyletic
Lycaenidae	Phaeostrymon alcestis	0.32	3.23	Match	Match	Monophyletic
Lycaenidae	Philotes sonorensis	0.16	2.97	Match	Match	Monophyletic
Lycaenidae	Philotiella leona	0	0.96	Merge	Match	Monophyletic
Lycaenidae	Philotiella speciosa	0.15	1.7	Match	Merge	Monophyletic
Lycaenidae	Plebejus anna	2.82	0	Merge	Mixture	Non-monophyletic
Lycaenidae	Plebejus fridayi	0.15	0	Merge	Merge	Non-monophyletic
Lycaenidae	Plebejus idas	3.02	0	Merge	Mixture	Non-monophyletic
Lycaenidae	Plebejus melissa	0.53	0	Merge	Merge	Non-monophyletic
Lycaenidae	Plebejus samuelis	ND	0.49	Merge	Merge	ND
Lycaenidae	Plebulina emigdionis	0.93	5.76	Match	Match	Monophyletic
Lycaenidae	Polyommatus icarus	0	5.49	Match	Match	Monophyletic
Lycaenidae	Rekoa marius	0.15	4.03	Match	Match	Monophyletic
Lycaenidae	Rekoa palegon	2.18	3.91	Split	Split	Monophyletic
Lycaenidae	Satyrium acadica	0.46	2.18	Match	Match	Monophyletic
Lycaenidae	Satyrium auretorum	1.94	2.59	Match	Split	Monophyletic
Lycaenidae	Satyrium behrii	2.19	4.25	Match	Split	Monophyletic
Lycaenidae	Satyrium calanus	0.77	1.55	Match	Match	Monophyletic
Lycaenidae	Satyrium californica	1.55	0	Merge	Merge	Non-monophyletic
Lycaenidae	Satyrium caryaevorus	0.31	1.39	Match	Match	Monophyletic
Lycaenidae	Satyrium edwardsii	0.17	1.39	Match	Match	Monophyletic
Lycaenidae	Satyrium favonius	1.87	2.02	Split	Split	Monophyletic
Lycaenidae	Satyrium fuliginosa	0.62	0.93	Merge	Match	Monophyletic
Lycaenidae	Satyrium ilavia	ND	2.19	Match	Match	ND
Lycaenidae	Satyrium kingi	0.15	3.84	Match	Match	Monophyletic
Lycaenidae	Satyrium liparops	1.32	3.84	Match	Match	Monophyletic
Lycaenidae	Satyrium polingi	0	2.02	Match	Match	Monophyletic
Lycaenidae	Satyrium saepium	2.99	2.94	Split	Split	Monophyletic
Lycaenidae	Satyrium semiluna	0.78	0.93	Merge	Match	Monophyletic
Lycaenidae	Satyrium sylvinus	0.93	0	Merge	Merge	Non-monophyletic
Lycaenidae	Satyrium tetra	1.57	2.94	Match	Split	Monophyletic
Lycaenidae	Satyrium titus	0.31	3.13	Match	Match	Monophyletic
Lycaenidae	Strephonota tephraeus	3.31	5.03	Split	Split	Monophyletic
Lycaenidae	Strymon acis	0.77	7.75	Match	Match	Monophyletic
Lycaenidae	Strymon albata	0.77	7.46	Match	Match	Monophyletic
Lycaenidae	Strymon alea	ND	7.21	Match	Match	ND
Lycaenidae	Strymon avalona	0	1.1	Match	Match	Monophyletic
Lycaenidae	Strymon bazochii	0	5.56	Match	Match	Monophyletic
Lycaenidae	Strymon bebrycia	ND	3.51	Match	Match	ND
Lycaenidae	Strymon cestri	ND	4.57	Match	Match	ND
Lycaenidae	Strymon istapa	0	4.11	Match	Match	Monophyletic
Lycaenidae	Strymon limenia	0	4.11	Match	Match	Monophyletic
Lycaenidae	Strymon martialis	ND	5.08	Match	Match	ND
Lycaenidae	Strymon melinus	0.77	1.1	Match	Match	Monophyletic
Lycaenidae	Strymon rufofusca	0.46	6.07	Match	Match	Monophyletic
Lycaenidae	Strymon serapio	ND	7.14	Match	Match	ND
Lycaenidae	Strymon yojoa	0.31	6.98	Match	Match	Monophyletic
Lycaenidae	Tmolus echion	0.46	3.51	Match	Match	Monophyletic
Lycaenidae	Ziegleria hesperitis	0.5	5.66	Match	Match	Monophyletic
Lycaenidae	Zizula cyna	0	10.32	Match	Match	Monophyletic
Nymphalidae	Adelpha basiloides	3.93	6.56	Split	Split	Monophyletic
Nymphalidae	Adelpha californica	1.08	1.55	Match	Match	Monophyletic
Nymphalidae	Adelpha eulalia	0.15	1.55	Match	Match	Monophyletic
Nymphalidae	Adelpha fessonia	0.31	8.44	Match	Match	Monophyletic
Nymphalidae	Aglais io	ND	5.84	Match	Match	ND
Nymphalidae	Aglais milberti	0.64	2.97	Match	Match	Monophyletic
Nymphalidae	Aglais urticae	0	2.97	Match	Match	Monophyletic
Nymphalidae	Agraulis vanillae	0.62	7.39	Match	Match	Monophyletic
Nymphalidae	Anaea aidea	0.31	2.82	Match	Match	Monophyletic
Nymphalidae	Anaea andria	0.32	2.44	Match	Match	Monophyletic
Nymphalidae	Anaea troglodyta	0	2.44	Match	Match	Monophyletic
Nymphalidae	Anartia chrysopelea	0	7.57	Match	Match	Monophyletic
Nymphalidae	Anartia fatima	ND	7.39	Match	Match	ND
Nymphalidae	Anartia jatrophae	0.62	7.39	Match	Match	Monophyletic
Nymphalidae	Anthanassa argentea	ND	6.4	Match	Match	ND
Nymphalidae	Anthanassa frisia	0.15	0.15	Merge	Merge	Non-monophyletic
Nymphalidae	Anthanassa ptolyca	ND	3.62	Match	Match	ND
Nymphalidae	Anthanassa texana	0	3.62	Match	Match	Monophyletic
Nymphalidae	Anthanassa tulcis	0	0.15	Merge	Merge	Monophyletic
Nymphalidae	Archaeoprepona demophon	0.87	10.3	Match	Match	Monophyletic
Nymphalidae	Asterocampa celtis	1.08	2.3	Match	Match	Monophyletic
Nymphalidae	Asterocampa clyton	2.2	2.01	Split	Split	Monophyletic
Nymphalidae	Asterocampa idyja	2.03	2.01	Split	Split	Monophyletic
Nymphalidae	Asterocampa leilia	0.77	2.3	Match	Match	Monophyletic
Nymphalidae	Biblis hyperia	0.49	8.06	Match	Match	Monophyletic
Nymphalidae	Boloria alaskensis	0.62	6.91	Match	Match	Monophyletic
Nymphalidae	Boloria alberta	0.15	0.64	Merge	Merge	Monophyletic
Nymphalidae	Boloria astarte	0.46	5.08	Match	Match	Monophyletic
Nymphalidae	Boloria bellona	0.96	2.89	Match	Match	Monophyletic
Nymphalidae	Boloria chariclea	1.93	5.09	Split	Split	Monophyletic
Nymphalidae	Boloria epithore	0.65	2.66	Match	Match	Monophyletic
Nymphalidae	Boloria eunomia	0.65	7.08	Match	Match	Monophyletic
Nymphalidae	Boloria freija	0.79	0	Merge	Merge	Non-monophyletic
Nymphalidae	Boloria frigga	4.27	2.59	Split	Split	Monophyletic
Nymphalidae	Boloria improba	2.5	2.06	Split	Split	Monophyletic
Nymphalidae	Boloria kriemhild	0.36	2.06	Match	Match	Monophyletic
Nymphalidae	Boloria natazhati	0.33	0	Merge	Merge	Non-monophyletic
Nymphalidae	Boloria polaris	0.96	0.64	Merge	Merge	Non-monophyletic
Nymphalidae	Boloria selene	3.81	5.25	Split	Split	Monophyletic
Nymphalidae	Cercyonis incognita	ND	0.17	Merge	Merge	ND
Nymphalidae	Cercyonis meadii	1.08	1.8	Match	Match	Monophyletic
Nymphalidae	Cercyonis oetus	0.62	0.17	Merge	Merge	Non-monophyletic
Nymphalidae	Cercyonis pegala	4.2	5.61	Split	Split	Monophyletic
Nymphalidae	Cercyonis sthenele	0.87	1.8	Match	Match	Monophyletic
Nymphalidae	Chlosyne acastus	3.15	0.15	Mixture	Mixture	Non-monophyletic
Nymphalidae	Chlosyne californica	0.77	4.94	Match	Match	Monophyletic
Nymphalidae	Chlosyne cyneas	0	2.98	Match	Match	Monophyletic
Nymphalidae	Chlosyne damoetas	0.95	1.16	Match	Match	Monophyletic
Nymphalidae	Chlosyne definita	0	2.49	Match	Match	Monophyletic
Nymphalidae	Chlosyne endeis	0	2.02	Merge	Match	Monophyletic
Nymphalidae	Chlosyne eumeda	0.15	2.03	Merge	Match	Monophyletic
Nymphalidae	Chlosyne fulvia	2.81	2.66	Split	Split	Non-monophyletic
Nymphalidae	Chlosyne gabbii	0.46	1.55	Match	Match	Monophyletic
Nymphalidae	Chlosyne gorgone	1.44	4.92	Match	Match	Monophyletic
Nymphalidae	Chlosyne harrisii	0.31	1.61	Match	Match	Monophyletic
Nymphalidae	Chlosyne hoffmanni	0.5	1.61	Match	Match	Monophyletic
Nymphalidae	Chlosyne janais	1.55	5.29	Match	Split	Monophyletic
Nymphalidae	Chlosyne lacinia	1.71	4.94	Match	Match	Monophyletic
Nymphalidae	Chlosyne leanira	0.93	2.66	Match	Match	Monophyletic
Nymphalidae	Chlosyne melitaeoides	ND	2.02	Merge	Match	ND
Nymphalidae	Chlosyne nycteis	0.97	4.27	Match	Match	Monophyletic
Nymphalidae	Chlosyne palla	1.2	0.15	Merge	Merge	Non-monophyletic
Nymphalidae	Chlosyne rosita	0	6.76	Match	Match	Monophyletic
Nymphalidae	Chlosyne theona	2.03	4.58	Match	Split	Monophyletic
Nymphalidae	Chlosyne whitneyi	ND	0.15	Merge	Merge	ND
Nymphalidae	Coenonympha haydenii	0.31	8.63	Match	Match	Monophyletic
Nymphalidae	Coenonympha tullia	1.64	8.63	Match	Match	Monophyletic
Nymphalidae	Cyllopsis gemma	2.19	6.52	Split	Split	Monophyletic
Nymphalidae	Cyllopsis pertepida	0.46	6.28	Match	Match	Monophyletic
Nymphalidae	Cyllopsis pyracmon	0	6.28	Match	Match	Monophyletic
Nymphalidae	Danaus eresimus	1.24	5.23	Match	Match	Monophyletic
Nymphalidae	Danaus gilippus	0.48	7.57	Match	Match	Monophyletic
Nymphalidae	Danaus plexippus	0.17	5.23	Match	Match	Monophyletic
Nymphalidae	Dione juno	0.15	7.6	Match	Match	Monophyletic
Nymphalidae	Dione moneta	0.16	7.6	Match	Match	Monophyletic
Nymphalidae	Dircenna klugii	0.35	5.07	Match	Match	Monophyletic
Nymphalidae	Doxocopa laure	0.31	10.14	Match	Match	Monophyletic
Nymphalidae	Doxocopa pavon	1.08	7.88	Match	Match	Monophyletic
Nymphalidae	Dryadula phaetusa	0.31	9.27	Match	Match	Monophyletic
Nymphalidae	Dryas iulia	1.86	8.41	Match	Split	Monophyletic
Nymphalidae	Dymasia dymas	0.62	5.23	Match	Match	Monophyletic
Nymphalidae	Dynamine dyonis	0.15	8.41	Match	Match	Monophyletic
Nymphalidae	Dynamine postverta	0.92	10.07	Match	Match	Monophyletic
Nymphalidae	Epiphile adrasta	0.32	9.25	Match	Match	Monophyletic
Nymphalidae	Erebia callias	0.15	6.79	Match	Match	Monophyletic
Nymphalidae	Erebia disa	0.47	0	Merge	Merge	Non-monophyletic
Nymphalidae	Erebia discoidalis	0.77	1.96	Match	Match	Monophyletic
Nymphalidae	Erebia epipsodea	1.08	6.26	Match	Match	Monophyletic
Nymphalidae	Erebia fasciata	0.82	0.15	Merge	Merge	Monophyletic
Nymphalidae	Erebia lafontainei	0.31	1.5	Match	Match	Monophyletic
Nymphalidae	Erebia mackinleyensis	1.08	0.15	Merge	Merge	Non-monophyletic
Nymphalidae	Erebia magdalena	2.26	0.31	Merge	Mixture	Non-monophyletic
Nymphalidae	Erebia mancinus	3	0	Mixture	Mixture	Non-monophyletic
Nymphalidae	Erebia occulta	0	0.15	Merge	Merge	Monophyletic
Nymphalidae	Erebia pawloskii	1.92	4.35	Match	Split	Monophyletic
Nymphalidae	Erebia rossii	0.48	5.74	Match	Match	Monophyletic
Nymphalidae	Erebia vidleri	1.29	4.35	Match	Match	Monophyletic
Nymphalidae	Erebia youngi	0.77	0.15	Merge	Merge	Non-monophyletic
Nymphalidae	Eueides isabella	0.62	7.39	Match	Match	Monophyletic
Nymphalidae	Eunica monima	0.15	6.25	Match	Match	Monophyletic
Nymphalidae	Eunica tatila	0	6.25	Match	Match	Monophyletic
Nymphalidae	Euphydryas anicia	1.71	0	Merge	Mixture	Non-monophyletic
Nymphalidae	Euphydryas chalcedona	1.87	0	Merge	Mixture	Non-monophyletic
Nymphalidae	Euphydryas colon	1.45	0	Merge	Mixture	Non-monophyletic
Nymphalidae	Euphydryas editha	3.31	0	Merge	Mixture	Non-monophyletic
Nymphalidae	Euphydryas gillettii	0.93	4.75	Match	Match	Monophyletic
Nymphalidae	Euphydryas phaeton	1.24	1.3	Merge	Match	Monophyletic
Nymphalidae	Euptoieta claudia	0.69	9.26	Match	Match	Monophyletic
Nymphalidae	Euptoieta hegesia	0	9.26	Match	Match	Monophyletic
Nymphalidae	Fountainea glycerium	0.15	7.24	Match	Match	Monophyletic
Nymphalidae	Greta morgane	0.31	5.07	Match	Match	Monophyletic
Nymphalidae	Gyrocheilus patrobas	0.15	10.94	Match	Match	Monophyletic
Nymphalidae	Hamadryas amphichloe	0.31	2.82	Match	Match	Monophyletic
Nymphalidae	Hamadryas amphinome	1.71	5.57	Split	Split	Monophyletic
Nymphalidae	Hamadryas atlantis	ND	8.52	Match	Match	ND
Nymphalidae	Hamadryas februa	0.15	2.82	Match	Match	Monophyletic
Nymphalidae	Hamadryas feronia	2.5	4.1	Split	Match	Monophyletic
Nymphalidae	Hamadryas glauconome	0.31	4.41	Match	Match	Monophyletic
Nymphalidae	Hamadryas guatemalena	ND	4.1	Match	Match	ND
Nymphalidae	Hamadryas iphthime	ND	6.24	Match	Match	ND
Nymphalidae	Heliconius charithonia	0.77	7.74	Match	Match	Monophyletic
Nymphalidae	Heliconius erato	0.62	7.74	Match	Match	Monophyletic
Nymphalidae	Hermeuptychia hermybius	0.15	1.75	Match	Match	Monophyletic
Nymphalidae	Hermeuptychia intricata	0.46	3.3	Match	Match	Monophyletic
Nymphalidae	Hermeuptychia sosybius	0.96	1.75	Match	Match	Monophyletic
Nymphalidae	Historis acheronta	0.15	8.24	Match	Match	Monophyletic
Nymphalidae	Historis odius	0.15	7.89	Match	Match	Monophyletic
Nymphalidae	Hypanartia lethe	0.33	6.81	Match	Match	Monophyletic
Nymphalidae	Hypolimnas misippus	2	9.44	Match	Split	Monophyletic
Nymphalidae	Junonia coenia	1.4	0	Merge	Merge	Non-monophyletic
Nymphalidae	Junonia evarete	0.93	0	Merge	Merge	Non-monophyletic
Nymphalidae	Junonia genoveva	0	0	Merge	Merge	Non-monophyletic
Nymphalidae	Lethe anthedon	1.71	1.15	Merge	Mixture	Non-monophyletic
Nymphalidae	Lethe appalachia	0.33	0.77	Merge	Merge	Monophyletic
Nymphalidae	Lethe creola	0.77	4.43	Match	Match	Monophyletic
Nymphalidae	Lethe eurydice	0.77	0.77	Merge	Merge	Monophyletic
Nymphalidae	Lethe portlandia	ND	1.15	Merge	Merge	ND
Nymphalidae	Libytheana carinenta	1.98	3.46	Match	Split	Monophyletic
Nymphalidae	Libytheana motya	0	3.46	Match	Match	Monophyletic
Nymphalidae	Limenitis archippus	2.34	1.64	Split	Split	Monophyletic
Nymphalidae	Limenitis arthemis	4.62	0	Mixture	Mixture	Non-monophyletic
Nymphalidae	Limenitis lorquini	1.56	0	Merge	Mixture	Non-monophyletic
Nymphalidae	Limenitis weidemeyerii	0.55	0.92	Merge	Merge	Monophyletic
Nymphalidae	Lycorea halia	0.62	9.96	Match	Match	Monophyletic
Nymphalidae	Manataria hercyna	0.15	9.12	Match	Match	Monophyletic
Nymphalidae	Marpesia chiron	0.46	8.24	Match	Match	Monophyletic
Nymphalidae	Marpesia eleuchea	0.92	5.46	Match	Match	Monophyletic
Nymphalidae	Marpesia petreus	0	5.46	Match	Match	Monophyletic
Nymphalidae	Marpesia zerynthia	0.68	7.91	Match	Merge	Monophyletic
Nymphalidae	Megisto cymela	1.87	6.31	Match	Split	Monophyletic
Nymphalidae	Megisto rubricata	6.99	10	Split	Split	Monophyletic
Nymphalidae	Melinaea lilis	0.15	8.58	Match	Match	Monophyletic
Nymphalidae	Memphis echemus	0	8.41	Match	Match	Monophyletic
Nymphalidae	Memphis forreri	2.03	7.73	Split	Split	Monophyletic
Nymphalidae	Memphis pithyusa	0.93	8.93	Match	Match	Monophyletic
Nymphalidae	Mestra amymone	0.15	8.06	Match	Match	Monophyletic
Nymphalidae	Microtia elva	0.85	5.23	Match	Match	Monophyletic
Nymphalidae	Morpho polyphemus	0.77	11.2	Match	Match	Monophyletic
Nymphalidae	Myscelia cyananthe	0.15	2.34	Match	Match	Monophyletic
Nymphalidae	Myscelia ethusa	0.93	2.34	Match	Match	Monophyletic
Nymphalidae	Neominois ridingsii	1.4	5.08	Match	Match	Monophyletic
Nymphalidae	Neonympha areolatus	0.46	1.08	Merge	Merge	Monophyletic
Nymphalidae	Neonympha helicta	ND	1.4	Merge	Match	ND
Nymphalidae	Neonympha mitchellii	0	1.08	Merge	Merge	Monophyletic
Nymphalidae	Nymphalis antiopa	0.77	4.05	Match	Match	Monophyletic
Nymphalidae	Nymphalis californica	0.17	4.05	Match	Match	Monophyletic
Nymphalidae	Nymphalis l-album	1.48	5.13	Match	Match	Monophyletic
Nymphalidae	Oeneis alberta	1.55	0	Merge	Mixture	Non-monophyletic
Nymphalidae	Oeneis alpina	0.31	3.47	Match	Match	Monophyletic
Nymphalidae	Oeneis bore	1.71	0	Merge	Merge	Non-monophyletic
Nymphalidae	Oeneis chryxus	1.87	0	Merge	Mixture	Non-monophyletic
Nymphalidae	Oeneis jutta	1.79	0.15	Merge	Mixture	Non-monophyletic
Nymphalidae	Oeneis macounii	0.31	2.33	Match	Match	Monophyletic
Nymphalidae	Oeneis melissa	3.86	0.15	Mixture	Mixture	Non-monophyletic
Nymphalidae	Oeneis nevadensis	0.62	0.31	Merge	Merge	Monophyletic
Nymphalidae	Oeneis philipi	0.31	0	Mixture	Merge	Non-monophyletic
Nymphalidae	Oeneis polixenes	5.26	0	Mixture	Mixture	Non-monophyletic
Nymphalidae	Oeneis tanana	0	0.15	Merge	Merge	Monophyletic
Nymphalidae	Oeneis uhleri	1.71	4.91	Split	Split	Monophyletic
Nymphalidae	Paramacera xicaque	0	7.92	Match	Match	Monophyletic
Nymphalidae	Phyciodes batesii	3.46	0	Mixture	Mixture	Non-monophyletic
Nymphalidae	Phyciodes cocyta	3.92	0	Mixture	Mixture	Non-monophyletic
Nymphalidae	Phyciodes graphica	0.15	4.88	Match	Match	Monophyletic
Nymphalidae	Phyciodes mylitta	4.11	0.18	Mixture	Mixture	Non-monophyletic
Nymphalidae	Phyciodes orseis	0.46	1.54	Match	Match	Monophyletic
Nymphalidae	Phyciodes pallescens	0.15	2.03	Match	Match	Monophyletic
Nymphalidae	Phyciodes pallida	1.86	0.18	Merge	Mixture	Non-monophyletic
Nymphalidae	Phyciodes phaon	1.87	1.85	Match	Split	Non-monophyletic
Nymphalidae	Phyciodes picta	0.31	2.03	Match	Match	Monophyletic
Nymphalidae	Phyciodes pulchella	3.48	0	Mixture	Mixture	Non-monophyletic
Nymphalidae	Phyciodes tharos	0.73	0	Merge	Merge	Non-monophyletic
Nymphalidae	Poladryas arachne	2.34	7.73	Match	Split	Monophyletic
Nymphalidae	Polygonia comma	0.31	1.86	Match	Match	Monophyletic
Nymphalidae	Polygonia faunus	0.67	2.82	Match	Match	Monophyletic
Nymphalidae	Polygonia gracilis	1.57	0	Merge	Mixture	Non-monophyletic
Nymphalidae	Polygonia interrogationis	0.17	1.86	Match	Match	Monophyletic
Nymphalidae	Polygonia oreas	0.62	0	Merge	Merge	Non-monophyletic
Nymphalidae	Polygonia progne	0.93	0.77	Merge	Match	Monophyletic
Nymphalidae	Polygonia satyrus	0.67	0.31	Merge	Merge	Monophyletic
Nymphalidae	Prepona laertes	0.31	11.89	Match	Match	Monophyletic
Nymphalidae	Pteronymia cotytto	0.32	5.72	Match	Match	Monophyletic
Nymphalidae	Siproeta epaphus	0.31	6.89	Match	Match	Monophyletic
Nymphalidae	Siproeta stelenes	1.7	6.89	Match	Split	Monophyletic
Nymphalidae	Smyrna blomfildia	0.31	7.5	Match	Match	Monophyletic
Nymphalidae	Smyrna karwinskii	ND	7.5	Match	Match	ND
Nymphalidae	Speyeria adiaste	0.15	0.46	Merge	Merge	Monophyletic
Nymphalidae	Speyeria aphrodite	0.67	2.14	Match	Match	Monophyletic
Nymphalidae	Speyeria atlantis	0.63	1.78	Match	Match	Monophyletic
Nymphalidae	Speyeria callippe	3.8	0	Mixture	Mixture	Non-monophyletic
Nymphalidae	Speyeria carolae	0	0.31	Merge	Merge	Monophyletic
Nymphalidae	Speyeria coronis	6.2	0	Mixture	Mixture	Non-monophyletic
Nymphalidae	Speyeria cybele	1.6	2.19	Match	Match	Monophyletic
Nymphalidae	Speyeria diana	0.31	3.62	Match	Match	Monophyletic
Nymphalidae	Speyeria edwardsii	1.57	0	Merge	Mixture	Non-monophyletic
Nymphalidae	Speyeria egleis	3.62	0	Mixture	Mixture	Non-monophyletic
Nymphalidae	Speyeria hesperis	5.1	0	Mixture	Mixture	Non-monophyletic
Nymphalidae	Speyeria hydaspe	1.27	0.46	Merge	Merge	Monophyletic
Nymphalidae	Speyeria idalia	0.47	5.44	Match	Match	Monophyletic
Nymphalidae	Speyeria mormonia	1.86	0.77	Merge	Mixture	Monophyletic
Nymphalidae	Speyeria nokomis	1.09	3.67	Match	Match	Monophyletic
Nymphalidae	Speyeria zerene	5.11	0	Mixture	Mixture	Non-monophyletic
Nymphalidae	Temenis laothoe	0.15	9.02	Match	Match	Monophyletic
Nymphalidae	Texola elada	ND	3.95	Match	Match	ND
Nymphalidae	Texola perse	0.46	3.95	Match	Match	Monophyletic
Nymphalidae	Vanessa annabella	0.31	5.66	Match	Match	Monophyletic
Nymphalidae	Vanessa atalanta	0.82	4.67	Match	Match	Monophyletic
Nymphalidae	Vanessa cardui	0.79	4.27	Match	Match	Monophyletic
Nymphalidae	Vanessa virginiensis	0.46	4.27	Match	Match	Monophyletic
Papilionidae	Battus philenor	1.08	6.1	Match	Match	Monophyletic
Papilionidae	Battus polydamas	5.28	6.1	Split	Split	Monophyletic
Papilionidae	Eurytides marcellus	0.31	9.28	Match	Match	Monophyletic
Papilionidae	Eurytides philolaus	0.93	9.09	Match	Match	Monophyletic
Papilionidae	Mimoides phaon	0.93	9.82	Match	Match	Monophyletic
Papilionidae	Papilio alexiares	ND	0.31	Merge	Merge	ND
Papilionidae	Papilio anchisiades	0.5	1.86	Match	Match	Monophyletic
Papilionidae	Papilio andraemon	0.91	5.9	Match	Match	Monophyletic
Papilionidae	Papilio androgeus	0.13	5.15	Match	Match	Monophyletic
Papilionidae	Papilio appalachiensis	ND	0	Merge	Merge	ND
Papilionidae	Papilio aristodemus	0.15	5.56	Match	Match	Monophyletic
Papilionidae	Papilio brevicauda	0.31	0	Merge	Merge	Non-monophyletic
Papilionidae	Papilio caiguanabus	ND	4.86	Match	Match	ND
Papilionidae	Papilio canadensis	0.78	1.49	Match	Match	Monophyletic
Papilionidae	Papilio cresphontes	0	2.31	Match	Match	Monophyletic
Papilionidae	Papilio eurymedon	1.11	0	Merge	Merge	Non-monophyletic
Papilionidae	Papilio garamas	ND	5.95	Match	Match	ND
Papilionidae	Papilio glaucus	0.77	0	Merge	Merge	Non-monophyletic
Papilionidae	Papilio indra	0	5.27	Match	Match	Monophyletic
Papilionidae	Papilio joanae	0	0	Merge	Merge	Monophyletic
Papilionidae	Papilio machaon	2.5	0	Merge	Mixture	Non-monophyletic
Papilionidae	Papilio multicaudata	0.31	2.37	Match	Match	Monophyletic
Papilionidae	Papilio ornythion	0	2.32	Match	Match	ND
Papilionidae	Papilio palamedes	0.92	5.41	Match	Match	Monophyletic
Papilionidae	Papilio pallas	0.67	2.32	Match	Match	Monophyletic
Papilionidae	Papilio pilumnus	ND	6.92	Match	Match	ND
Papilionidae	Papilio polyxenes	0.16	3.31	Match	Match	Monophyletic
Papilionidae	Papilio rogeri	0.46	1.86	Match	Match	Monophyletic
Papilionidae	Papilio rumiko	0.33	2.31	Match	Match	Monophyletic
Papilionidae	Papilio rutulus	0.93	0	Merge	Merge	Non-monophyletic
Papilionidae	Papilio thoas	2.18	5.1	Split	Split	Monophyletic
Papilionidae	Papilio troilus	0.8	5.41	Match	Match	Monophyletic
Papilionidae	Papilio victorinus	2.03	5.95	Split	Split	Monophyletic
Papilionidae	Papilio zelicaon	0.18	3.31	Match	Match	Monophyletic
Papilionidae	Parides alopius	0	7.73	Match	Match	Monophyletic
Papilionidae	Parides eurimedes	0.31	7.73	Match	Match	Monophyletic
Papilionidae	Parnassius behrii	0	0.31	Merge	Merge	Monophyletic
Papilionidae	Parnassius clodius	0.31	1.81	Match	Match	Monophyletic
Papilionidae	Parnassius eversmanni	0	1.81	Match	Match	Monophyletic
Papilionidae	Parnassius phoebus	2.71	1.08	Split	Match	Non-monophyletic
Papilionidae	Parnassius smintheus	0.78	0.31	Merge	Merge	Monophyletic
Pieridae	Abaeis nicippe	0.36	8.92	Match	Match	Monophyletic
Pieridae	Anteos clorinde	0.46	9.61	Match	Match	Monophyletic
Pieridae	Anteos maerula	0	11.23	Match	Match	Monophyletic
Pieridae	Anthocharis cethura	1.08	6.15	Match	Match	Monophyletic
Pieridae	Anthocharis julia	0.46	2.02	Match	Match	Monophyletic
Pieridae	Anthocharis lanceolata	0.31	6.67	Match	Match	Monophyletic
Pieridae	Anthocharis midea	1.45	6.35	Match	Match	Monophyletic
Pieridae	Anthocharis sara	1.08	2.24	Match	Match	Monophyletic
Pieridae	Anthocharis thoosa	0	2.02	Match	Match	Monophyletic
Pieridae	Aphrissa neleis	0	1.08	Merge	Merge	Monophyletic
Pieridae	Aphrissa orbis	0.93	4.28	Match	Match	Monophyletic
Pieridae	Aphrissa statira	0.34	1.08	Merge	Merge	Monophyletic
Pieridae	Ascia monuste	0.5	7.52	Match	Match	Monophyletic
Pieridae	Catasticta nimbice	0	14.28	Match	Match	Monophyletic
Pieridae	Colias alexandra	7.66	0	Mixture	Mixture	Non-monophyletic
Pieridae	Colias behrii	0.15	0	Merge	Merge	Non-monophyletic
Pieridae	Colias canadensis	2.97	0	Mixture	Mixture	Non-monophyletic
Pieridae	Colias christina	8.36	0	Mixture	Mixture	Non-monophyletic
Pieridae	Colias eriphyle	1.4	0	Merge	Mixture	Non-monophyletic
Pieridae	Colias eurytheme	0.62	0	Merge	Mixture	Non-monophyletic
Pieridae	Colias gigantea	2.82	0	Mixture	Mixture	Non-monophyletic
Pieridae	Colias harfordii	1.61	0	Merge	Mixture	Non-monophyletic
Pieridae	Colias hecla	3.04	0	Mixture	Mixture	Non-monophyletic
Pieridae	Colias interior	3.25	0	Mixture	Mixture	Non-monophyletic
Pieridae	Colias johanseni	0.15	0	Merge	Merge	Non-monophyletic
Pieridae	Colias meadii	1.1	0	Merge	Mixture	Non-monophyletic
Pieridae	Colias nastes	8.36	0	Mixture	Mixture	Non-monophyletic
Pieridae	Colias occidentalis	1.7	0	Mixture	Mixture	Non-monophyletic
Pieridae	Colias palaeno	8.31	0	Mixture	Mixture	Non-monophyletic
Pieridae	Colias pelidne	3.64	0	Mixture	Mixture	Non-monophyletic
Pieridae	Colias philodice	2.02	0	Merge	Mixture	Non-monophyletic
Pieridae	Colias rankinensis	0	0	Merge	Merge	Non-monophyletic
Pieridae	Colias scudderii	0.92	0	Merge	Mixture	Non-monophyletic
Pieridae	Colias skinneri	0	0	Merge	Merge	Non-monophyletic
Pieridae	Colias tyche	1.88	0	Merge	Mixture	Non-monophyletic
Pieridae	Colias vitabunda	0.94	0	Merge	Mixture	Non-monophyletic
Pieridae	Enantia albania	0.31	9.41	Match	Match	Monophyletic
Pieridae	Euchloe ausonides	1.24	3.14	Match	Match	Monophyletic
Pieridae	Euchloe creusa	2.5	2.16	Split	Split	Monophyletic
Pieridae	Euchloe guaymasensis	0.46	2.65	Match	Match	Monophyletic
Pieridae	Euchloe hyantis	0.18	0.15	Merge	Merge	Non-monophyletic
Pieridae	Euchloe lotta	1.45	0.15	Merge	Merge	Non-monophyletic
Pieridae	Euchloe naina	0.46	3.14	Match	Match	Monophyletic
Pieridae	Euchloe olympia	1.74	3.15	Match	Split	Monophyletic
Pieridae	Eurema albula	0.31	10.14	Match	Match	Monophyletic
Pieridae	Eurema boisduvaliana	0.31	5.56	Match	Match	Monophyletic
Pieridae	Eurema daira	0.15	8.89	Match	Match	Monophyletic
Pieridae	Eurema mexicana	0.62	5.39	Match	Match	Monophyletic
Pieridae	Eurema salome	0	5.39	Match	Match	Monophyletic
Pieridae	Ganyra howarthi	0.62	2.81	Match	Match	Monophyletic
Pieridae	Ganyra josephina	1.24	2.81	Match	Match	Monophyletic
Pieridae	Glutophrissa drusilla	0.54	9.6	Match	Match	Monophyletic
Pieridae	Itaballia demophile	0	9.48	Match	Match	Monophyletic
Pieridae	Kricogonia lyside	0.96	8.06	Match	Match	Monophyletic
Pieridae	Leptophobia aripa	0.15	7.79	Match	Match	Monophyletic
Pieridae	Melete lycimnia	0.31	13.24	Match	Match	Monophyletic
Pieridae	Nathalis iole	0.31	11.13	Match	Match	Monophyletic
Pieridae	Neophasia menapia	2.94	6.98	Split	Split	Monophyletic
Pieridae	Neophasia terlooii	0	6.98	Match	Match	Monophyletic
Pieridae	Phoebis agarithe	0.31	2.2	Match	Match	Monophyletic
Pieridae	Phoebis argante	0.31	2.18	Match	Match	Monophyletic
Pieridae	Phoebis neocypris	0.46	2.18	Match	Match	Monophyletic
Pieridae	Phoebis philea	0.31	5.57	Match	Match	Monophyletic
Pieridae	Phoebis sennae	0.77	5.57	Match	Match	Monophyletic
Pieridae	Pieriballia viardi	0.31	8.84	Match	Match	Monophyletic
Pieridae	Pieris angelika	0.61	0	Merge	Merge	Non-monophyletic
Pieridae	Pieris marginalis	2.66	0	Merge	Mixture	Non-monophyletic
Pieridae	Pieris oleracea	1.55	0	Merge	Mixture	Non-monophyletic
Pieridae	Pieris rapae	0.93	6.62	Match	Match	Monophyletic
Pieridae	Pieris virginiensis	0.9	1.24	Merge	Match	Monophyletic
Pieridae	Pontia beckerii	0.35	6.65	Match	Match	Monophyletic
Pieridae	Pontia occidentalis	0.83	4.31	Match	Match	Monophyletic
Pieridae	Pontia protodice	0.66	4.31	Match	Match	Monophyletic
Pieridae	Pontia sisymbrii	3.97	6.62	Split	Split	Monophyletic
Pieridae	Pyrisitia dina	0	9.62	Match	Match	Monophyletic
Pieridae	Pyrisitia lisa	0.77	5.7	Match	Match	Monophyletic
Pieridae	Pyrisitia messalina	ND	8.24	Match	Match	ND
Pieridae	Pyrisitia nise	0.46	5.7	Match	Match	Monophyletic
Pieridae	Pyrisitia proterpia	2.35	7.77	Split	Split	Monophyletic
Pieridae	Zerene cesonia	0.61	2.57	Match	Match	Monophyletic
Pieridae	Zerene eurydice	0	2.57	Match	Match	Monophyletic
Riodinidae	Apodemia duryi	0	0.31	Merge	Merge	Monophyletic
Riodinidae	Apodemia mejicanus	4.55	0.15	Mixture	Mixture	Non-monophyletic
Riodinidae	Apodemia mormo	4.76	0	Mixture	Mixture	Non-monophyletic
Riodinidae	Apodemia phyciodoides	0	8.07	Match	Match	Monophyletic
Riodinidae	Apodemia virgulti	2.42	0	Merge	Mixture	Non-monophyletic
Riodinidae	Baeotis zonata	0	7.61	Match	Match	Monophyletic
Riodinidae	Calephelis arizonensis	0.17	1.81	Match	Match	Monophyletic
Riodinidae	Calephelis borealis	0	2.54	Match	Match	Monophyletic
Riodinidae	Calephelis muticum	0	1.48	Match	Match	Monophyletic
Riodinidae	Calephelis nemesis	1.38	1.77	Split	Match	Monophyletic
Riodinidae	Calephelis perditalis	0	2.78	Match	Match	Monophyletic
Riodinidae	Calephelis rawsoni	ND	1.77	ND	Match	ND
Riodinidae	Calephelis virginiensis	1.48	1.48	Split	Match	Monophyletic
Riodinidae	Calephelis wrighti	0.61	3.31	Match	Match	Monophyletic
Riodinidae	Caria ino	0	10.31	Match	Match	Monophyletic
Riodinidae	Emesis ares	0	5.41	Match	Match	Monophyletic
Riodinidae	Emesis emesia	0.31	7.72	Match	Match	Monophyletic
Riodinidae	Emesis tenedia	0	8.77	Match	Match	Monophyletic
Riodinidae	Emesis zela	0.18	6.1	Match	Match	Monophyletic
Riodinidae	Lasaia maria	0	5.39	Match	Match	Monophyletic
Riodinidae	Lasaia sula	ND	6.38	Match	Match	ND
Riodinidae	Melanis pixe	0.15	7.71	Match	Match	Monophyletic
Riodinidae	Neoapodemia nais	0.83	5.41	Match	Match	Monophyletic
Riodinidae	Plesioarida hepburni	0.31	5.08	Match	Match	Monophyletic
Riodinidae	Plesioarida palmerii	3.92	5.41	Split	Split	Monophyletic
Riodinidae	Plesioarida walkeri	ND	5.08	Match	Match	ND
		Average: 0.97	Average: 3.7	Total OTUs: 772	Total OTUs: 862	Total monophyletic: 604
